# Supplementary material
Source: PubMed Central journal article supplement (PMC4873406)
Supplement: NIHMS744726-supplement-Supp_Table_S1.pdf [file NIHMS744726-supplement-Supp_Table_S1.pdf]

Bobilev et al.

1  
2  
3  
4  
5  
6  
7  
8  
9  
10  
11  
12  
13  
14  
15  
16  
17  
18  
19  
20  
21  
22  
23  
24  
25  
26  
27  
28  
29  
30  
31  
32  
33  
34  
35  
36  
37  
38  
39  
40  
41  
42  
43  
44  
45  
46  
47  
48  
49

| <i>FID</i> | <i>Person ID</i> | <i>Sex</i> | <i>Inheritance</i> | <i>Variant</i>         | <i>Variant Sequence</i>                                                                                                              |
|------------|------------------|------------|--------------------|------------------------|--------------------------------------------------------------------------------------------------------------------------------------|
| 100        | 100A151/s-100    | F          | Sporadic           | c.357+1G>A             | CATACCAAGC/ <u>a</u> taagttcattg                                                                                                     |
| 101        | 101A111/s-101    | F          | Sporadic           | c.112-116delCGGCC      | GCGGGGCC(CGGCC)GTGCGACATTTCCGAATTCTGCAG/                                                                                             |
| 102        | 102A127/s-102    | F          | Sporadic           | c.607C>T               | CAA ATG <u>T</u> GA CTT CAG                                                                                                          |
| 103        | 103A025/s-103    | M          | Sporadic           | c.802_806delGAAGA      | CGA AGG GCC AAA TGG AGA AGA (GAA GA)A AAA CTG                                                                                        |
| 104        | 104A098/s-104    | M          | Sporadic           | c.454C>T               | AAC GGG <u>T</u> AG ACC GGA                                                                                                          |
| 105        | 105A046/u-105    | F          | Parents Unknown    | c.357+1G>T             | CATACCAAGC/ <u>t</u> taagttcattg                                                                                                     |
| 108        | 108A128/f-108    | M          | Familial           | c.63-70delGCCGGACT     | GGG CGG CCA CT(G CCG GAC T)CC ACC CGG CAG                                                                                            |
| 110        | 110A005/s-110    | F          | Sporadic           | c.794G>A               | GCC AAA <u>T</u> AG AGA AGA                                                                                                          |
| 112        | 112A047/f-113    | F          | Familial           | c.199A>T               | TCC ATC <u>T</u> GA CCC AGG                                                                                                          |
| 112        | 112A065/f-112    | F          | Familial           | c.199A>T               | TCC ATC <u>T</u> GA CCC AGG                                                                                                          |
| 112        | 112A068/f-114    | M          | Familial           | c.199A>T               | TCC ATC <u>T</u> GA CCC AGG                                                                                                          |
| 112        | 112A147/f-128    | F          | Familial           | c.199A>T               | TCC ATC <u>T</u> GA CCC AGG                                                                                                          |
| 114        | 114A157/s-172    | F          | Sporadic           | c.482delG              | CGC CCT G(G)T TGG TAT                                                                                                                |
| 114        | 114A159/f-173    | M          | Familial           | c.482delG              | CGC CCT G(G)T TGG TAT                                                                                                                |
| 114        | 114A158/f-174    | F          | Familial           | c.482delG              | CGC CCT G(G)T TGG TAT                                                                                                                |
| 115        | 115A062/s-115    | F          | Sporadic           | c.1268A>T              | TTA CAG <u>T</u> TA] AAAAAAAAAAAAA                                                                                                   |
| 117        | 117A040/s-117    | F          | Sporadic           | c.524-101_534del112 bp | ggtgaggctg(tcgggatataatgctcttgaggttaagacta caccagcccccttttgaggctccaagttaatccaaatttctctaccatcctattctttgtccag/ATGGCTGCCAG) CAACAGGAAGG |
| 118        | 118A051/s-118    | M          | Sporadic           | c.57delG               | GTC AAC GGG CG(G) CCA CTG CCG                                                                                                        |
| 119        | 119A107/s-119    | M          | Sporadic           | c.1183+1G>A            | ACTTCAACAG/ <u>a</u> tgagccactgc                                                                                                     |
| 120        | 120A131/f-120    | M          | Familial           | c.949C>T               | TTG GGC <u>T</u> GA ACA GAC                                                                                                          |
| 122        | 122A023/s-122    | F          | Sporadic           | c.1033-2A>G            | ctctcctcac <u>g</u> /CCCCCAGTCC                                                                                                      |
| 122        | 122A221/f-197    | F          | Familial           | c.1033-2A>G            | ctctcctcac <u>g</u> /CCCCCAGTCC                                                                                                      |

Bobilev et al.

|     |               |   |          |                                                 |                                                           |
|-----|---------------|---|----------|-------------------------------------------------|-----------------------------------------------------------|
| 124 | 124A141/s-124 | F | Sporadic | c.771delG                                       | CAG GTA TG(G) TTT TCT AAT                                 |
| 126 | 126A092/s-126 | M | Sporadic | c.467G>A                                        | GGA AGC T <u>A</u> G GGC ACC                              |
| 127 | 127A123/s-127 | F | Sporadic | c.480delT                                       | ACC CGC CC(T) GGT TGG TAT CCG                             |
| 128 | 128A200/s-190 | F | Sporadic | c.141+18_+20delGCC                              | AATTCTGCAG/gtgatcctccccggcgcc(gcc)cca<br>c                |
| 129 | 129A024/s-129 | F | Sporadic | c.357+1G>A                                      | CATACCAAGC/ <u>a</u> taagttcattg                          |
| 130 | 130A081/f-130 | M | Familial | c.1032+6T>G                                     | CTGCCTATGCAA/gtaagggcgcgct                                |
| 130 | 130A135/f-170 | F | Familial | c.1032+6T>G                                     | CTGCCTATGCAA/gtaagggcgcgct                                |
| 133 | 133A039/s-133 | F | Sporadic | c.112delC                                       | GGG GCC (C)GG CCG TGC                                     |
| 135 | 135A035/s-135 | F | Sporadic | c.122_123insGCGG                                | CCG TGC GA(GCGG)C ATT TCC                                 |
| 138 | 138A028/s-138 | M | Sporadic | c.141+1G>T                                      | AATTCTGCAG/ <u>t</u> gatcctccc                            |
| 140 | 140A195/s-185 | M | Sporadic | c.1268A>T                                       | TTA CAG T <u>T</u> A] AAAAAAAAAAAAA                       |
| 141 | 141A009/s-141 | F | Sporadic | c.401delA                                       | GCT AGC GAA A(A)G CAA CAG ATG                             |
| 141 | 141A010/f-140 | M | Familial | c.401delA                                       | GCT AGC GAA A(A)G CAA CAG ATG                             |
| 143 | 143A077/s-143 | F | Sporadic | c.1174_+6delACTTCAACAGG<br>TGAGC                | GGGCACCTCGGGCACC(ACTTCAACA<br>G/gtgagc)cactg              |
| 144 | 144A083/f-144 | F | Familial | c.781C>T                                        | TCT AAT <u>T</u> G A AGG GCC                              |
| 144 | 144A089/f-167 | M | Familial | c.781C>T                                        | TCT AAT <u>T</u> G A AGG GCC                              |
| 144 | 144A300/f-224 | M | Familial | c.781C>T                                        | TCT AAT <u>T</u> G A AGG GCC                              |
| 147 | 147A017/f-147 | M | Familial | c.204delC                                       | ATC AGA CC(C) AGG GCA                                     |
| 147 | 147A059/f-146 | M | Familial | c.204delC                                       | ATC AGA CC(C) AGG GCA                                     |
| 147 | 147A061/f-149 | M | Familial | c.204delC                                       | ATC AGA CC(C) AGG GCA                                     |
| 147 | 147A064/f-148 | F | Familial | c.204delC                                       | ATC AGA CC(C) AGG GCA                                     |
| 150 | 150A018/s-150 | F | Sporadic | c.179-<br>185delATTACGAinsCTGAT                 | GGGCAGGT(CTGAT)GACTGGCTCCAT                               |
| 150 | 150A106/f-151 | M | Familial | c.179-<br>185delATTACGAinsCTGAT                 | GGGCAGGT(CTGAT)GACTGGCTCCAT                               |
| 152 | 152A114/s-152 | F | Sporadic | c.141+2_+30delTGATCCTCCC<br>GGCGCCGCCCCACTCGCCG | AATTCTGCAG/g(tgatcctccccggcgccccca<br>ctcgccg)cccccgcgccc |
| 153 | 153A075/s-153 | F | Sporadic | c.949C>T                                        | TTG GGC <u>T</u> G A ACA GAC                              |

Bobilev et al.

|    |      |                 |   |                    |                                |                                  |
|----|------|-----------------|---|--------------------|--------------------------------|----------------------------------|
| 1  |      |                 |   |                    |                                |                                  |
| 2  |      |                 |   |                    |                                |                                  |
| 3  | 153  | 153A048/f-154   | M | Familial           | c.949C>T                       | TTG GGC <u>T</u> G A CA G AC     |
| 4  | 155  | 155A102/s-155   | M | Sporadic           | c.332insG                      | GAG GGG <u>G</u> GTC TGT ACC     |
| 5  | 157  | 157A121/s-157   | F | Sporadic           | c.28C>T                        | GTG AAT <u>T</u> AG CTC GGT      |
| 6  | 160  | 160A091/s-160   | F | Sporadic           | c.607C>T                       | CAA ATG <u>T</u> G A CTT CAG     |
| 7  | 163  | 163A041/s-163   | F | Sporadic           | c.352-357+2delCCAAGCGT         | CATA(CCAAGC/gt)aagttcattg        |
| 8  | 164  | 164A060/s-164   | F | Sporadic           | c.781C>T                       | TCT AAT <u>T</u> G A AGG GCC     |
| 9  | 168  | 168A014/s-168   | F | Sporadic           | c.365C>A                       | GTG TCA <u>T</u> A A ATA AAC     |
| 10 | 169  | 169A080/s-169   | F | Sporadic           | c.358-3_361delCAGGTGT          | tttgattg(cag/GTGT)CATCAA         |
| 11 | 170  | 170A174/s-184   | F | Sporadic           | c.781C>T                       | TCT AAT <u>T</u> G A AGG GCC     |
| 12 | 173  | 173A291/s-220   | F | Sporadic           | c.766-3C>G                     | cctgattc <u>g</u> ag/GTATGGTTTT  |
| 13 | 185  | 185A164/s-180   | F | Sporadic           | c.1256delC                     | TGG C(C)A AGA TTA CAG TAA        |
| 14 | 189  | 189A257/s-209   | M | Sporadic           | c.631C>T                       | AAG CTG <u>T</u> A A AGA AAT     |
| 15 | 191  | 191A297/s-222   | F | Sporadic           | c.799A>T                       | TGG AGA <u>T</u> G A GAA GAA     |
| 16 | 227  | 227A302/s-227   | M | Sporadic           | c.795G>A                       | GCC AAA <u>T</u> G A AGA AGA     |
| 17 | 230  | 230A309/s-230   | M | Sporadic           | c.357+1G>A                     | CATACCAAGC/ <u>a</u> taagttcattg |
| 18 | 232  | 232A315/s-211   | F | Sporadic           | c.781C>T                       | TCT AAT <u>T</u> G A AGG GCC     |
| 19 | 1001 | 1001A316/sUGA   | M | Sporadic           | c.949C>T                       | TTG GGC <u>T</u> G A ACA GAC     |
| 20 | 1003 | 1003A318/sUGA   | F | Sporadic           | c.343delG                      | TGT ACC AAC (G)AT AAC ATA        |
| 21 | 1004 | 1004A321/sUGA   | M | Sporadic           | c.1183+1G>A                    | CAACAG/ <u>a</u> tgagcc          |
| 22 | 228  | 228A305/s-228   | M | Sporadic           | Deletion P1 promoter to exon 4 |                                  |
| 23 | 1002 | 1002A317/sUGA   | F | Sporadic           | Deletion exons 6 and 7         |                                  |
| 24 | 161  | 161A100/s-161   | F | Sporadic           | WT1-PAX6; 3' extent unknown    |                                  |
| 25 | 174  | 174A185/sw-191  | F | Sporadic           | WT1-PAX6; 3' extent unknown    |                                  |
| 26 | 180  | 180A182/sw-190  | F | Sporadic           | WT1-PAX6; 3' extent unknown    |                                  |
| 27 | 182  | 182A239/sw-201  | F | Sporadic           | WT1-PAX6; 3' extent unknown    |                                  |
| 28 | 214  | 214A285/s060158 | M | Parents<br>Unknown | WT1-PAX6; 3' extent unknown    |                                  |
| 29 | 219  | 219A261/s121996 | F | Sporadic           | WT1-PAX6; 3' extent unknown    |                                  |
| 30 | 225  | 225A280/s72581  | F | Sporadic           | WT1-PAX6; 3' extent unknown    |                                  |
| 31 |      |                 |   |                    |                                |                                  |
| 32 |      |                 |   |                    |                                |                                  |
| 33 |      |                 |   |                    |                                |                                  |
| 34 |      |                 |   |                    |                                |                                  |
| 35 |      |                 |   |                    |                                |                                  |
| 36 |      |                 |   |                    |                                |                                  |
| 37 |      |                 |   |                    |                                |                                  |
| 38 |      |                 |   |                    |                                |                                  |
| 39 |      |                 |   |                    |                                |                                  |
| 40 |      |                 |   |                    |                                |                                  |
| 41 |      |                 |   |                    |                                |                                  |
| 42 |      |                 |   |                    |                                |                                  |
| 43 |      |                 |   |                    |                                |                                  |
| 44 |      |                 |   |                    |                                |                                  |
| 45 |      |                 |   |                    |                                |                                  |
| 46 |      |                 |   |                    |                                |                                  |
| 47 |      |                 |   |                    |                                |                                  |
| 48 |      |                 |   |                    |                                |                                  |
| 49 |      |                 |   |                    |                                |                                  |

Bobilev et al.

|    |     |               |   |          |                     |
|----|-----|---------------|---|----------|---------------------|
| 1  |     |               |   |          |                     |
| 2  |     |               |   |          |                     |
| 3  | 501 | 501A320/sUGA  | F | Sporadic | Deletion of PAX6    |
| 4  | 121 | 121A049/s-121 | F | Sporadic | No changes detected |
| 5  | 162 | 162A122/s-162 | F | Sporadic | c.766-12C>T         |
| 6  | 166 | 166A069/s-166 | F | Sporadic | c.766-12C>T         |
| 7  | 190 | 190A305/501F  | F | Sporadic | c.766-12C>T         |
| 8  | 231 | 231A312/s-231 | F | Sporadic | No changes detected |
| 9  |     |               |   |          |                     |
| 10 |     |               |   |          |                     |
| 11 |     |               |   |          |                     |
| 12 |     |               |   |          |                     |
| 13 |     |               |   |          |                     |
| 14 |     |               |   |          |                     |
| 15 |     |               |   |          |                     |
| 16 |     |               |   |          |                     |
| 17 |     |               |   |          |                     |
| 18 |     |               |   |          |                     |
| 19 |     |               |   |          |                     |
| 20 |     |               |   |          |                     |
| 21 |     |               |   |          |                     |
| 22 |     |               |   |          |                     |
| 23 |     |               |   |          |                     |
| 24 |     |               |   |          |                     |
| 25 |     |               |   |          |                     |
| 26 |     |               |   |          |                     |
| 27 |     |               |   |          |                     |
| 28 |     |               |   |          |                     |
| 29 |     |               |   |          |                     |
| 30 |     |               |   |          |                     |
| 31 |     |               |   |          |                     |
| 32 |     |               |   |          |                     |
| 33 |     |               |   |          |                     |
| 34 |     |               |   |          |                     |
| 35 |     |               |   |          |                     |
| 36 |     |               |   |          |                     |
| 37 |     |               |   |          |                     |
| 38 |     |               |   |          |                     |
| 39 |     |               |   |          |                     |
| 40 |     |               |   |          |                     |
| 41 |     |               |   |          |                     |
| 42 |     |               |   |          |                     |
| 43 |     |               |   |          |                     |
| 44 |     |               |   |          |                     |
| 45 |     |               |   |          |                     |
| 46 |     |               |   |          |                     |
| 47 |     |               |   |          |                     |
| 48 |     |               |   |          |                     |
| 49 |     |               |   |          |                     |

For Review Only
