# Supplementary material
Source: PubMed Central journal article supplement (PMC4873406)
Supplement: NIHMS744726-supplement-Supp_Table_S2.pdf [file NIHMS744726-supplement-Supp_Table_S2.pdf]

Bobilev et al.

## Supplementary Table 2

| Exon         | 5' flanking sequence             | Exon size (bp) | 3' flanking sequence           |                         |
|--------------|----------------------------------|----------------|--------------------------------|-------------------------|
| 0            | ...gcctgcctgagc [ACCCTCTTTT...   | 153            | ...CCGCTCCCAG/gtaaccgcccgg...  | P <sub>0</sub> , 5' UTR |
| 1            | ...tgagagcgagcg [GTGCATTTGC...   | 216            | ...ATCAGCATAG/gtgtgctggctg...  | P <sub>1</sub> , 5' UTR |
| 1'           | ...tgagagcgagcg [GTGCATTTGC...   | 503            | ...CCTCATAAAG/gtgagtccgctt...  | 5' UTR                  |
| 2            | ...tctccttcccag/GAATCTGAGA...    | 188            | ...CCTCATAAAG/gtgagtccgctt...  | 5' UTR                  |
| 3            | ...gttttgtcttag/GGGGAAGACT...    | 77             | ...GAGATTTTCAG/gcaagttctgtg... | 5' UTR                  |
| 4            | ...tcttgctaacag/AGCCCCATAT...    | 61             | ...ATGCAGAACA/gtaagtgcctct...  | Start ORF               |
| <i>alpha</i> | ...cgtcaatztatc [AGTAGGCTCC...   | ~95            | ...GGGGCTGCAG/gttggagatttt...  | P <sub>α</sub> , UTR    |
| 5            | ...ccctttcctcag/GTCACAGCGG...    | 131            | ...AATTCCTGCAG/gtgatcctcccg... | Coding                  |
| 5a           | ...tttgtgttatag/ACCCATGCAG...    | 42             | ...CAATCAAAAC/gtaagcttgca...   | Coding                  |
| 6            | ...tcccctatgcag/GTGTCCAACG...    | 216            | ...CATACCAAGC/gtaagttcattg...  | Coding                  |
| 7            | ...tttgatttgagcag/GTGTTCATCAA... | 166            | ...CCTACGCAAG/gtaaaaccaag...   | Coding                  |
| 8            | ...tttttgttccag/ATGGCTGCCA...    | 159            | ...CTGGAGAAAAG/gtgatagagttt... | Coding                  |
| 9            | ...ttactctttcag/AGTTTGAGAG...    | 83             | ...AAGAATACAG/gtaccgagagac...  | Coding                  |
| 10           | ...cctgatttcag/GTATGGTTTT...     | 151            | ...ACCACACCGG/gtaatttgaaat...  | Coding                  |
| 11           | ...tcttgccctcag/TTCCTCCTT...     | 116            | ...GCCTATGCAA/gtaagtgcggct...  | Coding                  |
| 12           | ...ctctcctcacag/CCCCAGTCC...     | 151            | ...ACTTCAACAG/gtgagccactgc...  | Coding                  |
| 13           | ...atccacttctag/GACTCATTTTC...   | 1110           | ...TTTAACCTTA] tacagttttctt... | END ORF                 |
